# Supplementary material for: Association of walking speed in late midlife with mortality: results from the Whitehall II cohort study
Source: Springer Nature journal article supplement (doi:10.1007/s11357-012-9387-9), 2012-02-23
Supplement: MOESM1 [file 11357_2012_9387_MOESM1_ESM.pdf]

**Table S1** Hazard ratios for all-cause, cardiovascular, and cancer mortality per 0.1 m/s higher walking speed (continuous variable).

| N deaths / N                                                | All-cause mortality |           |      | Cardiovascular mortality |           |      | Cancer mortality |           |      |
|-------------------------------------------------------------|---------------------|-----------|------|--------------------------|-----------|------|------------------|-----------|------|
|                                                             | 227/6266            |           |      | 62/6266                  |           |      | 111/6266         |           |      |
| Adjustment                                                  | HR <sup>a</sup>     | 95% CI    | % Δ  | HR <sup>a</sup>          | 95% CI    | % Δ  | HR <sup>a</sup>  | 95% CI    | % Δ  |
| Model 1: Adjusted for age and sex                           | 0.87                | 0.83-0.92 | --   | 0.86                     | 0.79-0.94 | --   | 0.89             | 0.84-0.96 | --   |
| Model 2: Model 1 + socioeconomic status                     | 0.88                | 0.83-0.92 | 1.4  | 0.87                     | 0.79-0.95 | 5.7  | 0.89             | 0.83-0.95 | -8.0 |
| Model 3: Model 1 + height + BMI                             | 0.89                | 0.85-0.94 | 15.3 | 0.88                     | 0.80-0.96 | 14.1 | 0.91             | 0.85-0.97 | 13.8 |
| Model 4: Model 1 + health behaviours <sup>b</sup>           | 0.89                | 0.85-0.93 | 11.6 | 0.88                     | 0.80-0.96 | 13.3 | 0.91             | 0.85-0.97 | 12.5 |
| Model 5: Model 1 + cardiovascular risk factors <sup>c</sup> | 0.88                | 0.84-0.92 | 4.3  | 0.87                     | 0.79-0.95 | 4.4  | 0.90             | 0.84-0.96 | 5.1  |
| Model 6: Model 1 + chronic conditions <sup>d</sup>          | 0.89                | 0.85-0.93 | 14.8 | 0.89                     | 0.82-0.98 | 25.7 | 0.91             | 0.85-0.97 | 15.6 |
| Model 7: Model 1 + cognitive function <sup>e</sup>          | 0.88                | 0.84-0.92 | 4.6  | 0.87                     | 0.79-0.95 | 6.8  | 0.89             | 0.83-0.96 | -1.5 |
| Model 8: Model 1 + inflammatory markers <sup>f</sup>        | 0.90                | 0.86-0.94 | 20.5 | 0.89                     | 0.81-0.98 | 23.7 | 0.91             | 0.85-0.98 | 17.1 |
| Model 9: Fully-adjusted                                     | 0.93                | 0.88-0.98 | 44.3 | 0.94                     | 0.85-1.03 | 55.6 | 0.93             | 0.86-1.00 | 35.8 |

<sup>a</sup> HR computed using Cox proportional-hazards models with age as the time-axis for an increase of 0.1 m/s in walking speed. The assumption of proportionality of hazards was verified (all-cause, P=0.41; cardiovascular, P=0.85; cancer, P=0.25). The percentage reduction (% Δ) of the association between walking speed and mortality attributed to covariates included in model *i* was calculated using the formula  $100 \times (\beta_{Model\ 1} - \beta_{Model\ i}) / (\beta_{Model\ 1})$ , where  $\beta$  is the regression coefficient obtained from the Cox proportional hazards model.

<sup>b</sup> Smoking history, alcohol consumption, physical activity, and fruit and vegetable consumption.

<sup>c</sup> Systolic and diastolic blood pressure, blood cholesterol, and heart rate.

<sup>d</sup> History of diabetes, coronary heart disease, self-reported stroke, arthritis, and respiratory diseases, and anti-depressant use at Phase 7.

<sup>e</sup> AH4-I test.

<sup>f</sup> Interleukin-6 and C-reactive protein (log-transformed).

**Table S2** Hazard ratios for cardiovascular and cancer mortality according to walking speed (bottom tertile versus middle and top tertiles combined).

| N deaths / N                                                | Cardiovascular mortality |           |      | Cancer mortality |           |      |
|-------------------------------------------------------------|--------------------------|-----------|------|------------------|-----------|------|
|                                                             | 62/6266                  |           |      | 111/6266         |           |      |
| Adjustment                                                  | HR <sup>a</sup>          | 95% CI    | % Δ  | HR <sup>a</sup>  | 95% CI    | % Δ  |
| Model 1: Adjusted for age and sex                           | 2.24                     | 1.34-3.74 | --   | 1.62             | 1.11-2.36 | --   |
| Model 2: Model 1 + socioeconomic status                     | 2.12                     | 1.26-3.58 | 6.5  | 1.67             | 1.14-2.46 | -7.3 |
| Model 3: Model 1 + height + BMI                             | 1.99                     | 1.18-3.38 | 14.0 | 1.49             | 1.01-2.19 | 17.1 |
| Model 4: Model 1 + health behaviours <sup>b</sup>           | 2.07                     | 1.23-3.50 | 9.4  | 1.47             | 1.00-2.16 | 19.2 |
| Model 5: Model 1 + cardiovascular risk factors <sup>c</sup> | 2.19                     | 1.31-3.66 | 2.8  | 1.59             | 1.08-2.32 | 3.9  |
| Model 6: Model 1 + chronic conditions <sup>d</sup>          | 1.86                     | 1.10-3.16 | 22.8 | 1.50             | 1.02-2.20 | 15.7 |
| Model 7: Model 1 + cognitive function <sup>e</sup>          | 2.12                     | 1.26-3.58 | 6.6  | 1.61             | 1.09-2.36 | 1.3  |
| Model 8: Model 1 + inflammatory markers <sup>f</sup>        | 1.85                     | 1.10-3.13 | 23.4 | 1.46             | 0.99-2.14 | 21.2 |
| Model 9: Fully-adjusted                                     | 1.50                     | 0.86-2.62 | 49.3 | 1.28             | 0.86-1.92 | 48.2 |

<sup>a</sup> HR computed using Cox proportional-hazards models with age as the time-axis for participants in the bottom tertile of walking speed (<1.26 m/s in men; <1.09 m/s in women) compared to participants in the top and middle tertiles combined. The assumption of proportionality of hazards was verified (cardiovascular, P=0.55; cancer, P=0.72). The percentage reduction (% Δ) of the association between walking speed and mortality attributed to covariates included in model *i* was calculated using the formula  $100 \times (\beta_{Model\ 1} - \beta_{Model\ i}) / (\beta_{Model\ 1})$ , where  $\beta$  is the regression coefficient obtained from the Cox proportional hazards model.

<sup>b</sup> Smoking history, alcohol consumption, physical activity, and fruit and vegetable consumption.

<sup>c</sup> Systolic and diastolic blood pressure, blood cholesterol, and heart rate.

<sup>d</sup> History of diabetes, coronary heart disease, self-reported stroke, arthritis, and respiratory diseases, and anti-depressant use at Phase 7.

<sup>e</sup> AH4-I test.

<sup>f</sup> Interleukin-6 and C-reactive protein (log-transformed).
